# Supplementary material for: What Can Make the Difference Between Chronotypes in Sleep Duration? Testing the Similarity of Their Homeostatic Processes
Source: Front Neurosci. 2022 Mar 1;16:832807. doi: 10.3389/fnins.2022.832807 (PMC8920995; doi:10.3389/fnins.2022.832807)
Supplement: Supplementary file 1 [file Data_Sheet_1.xlsx]

## Sheet: 50 paired samples
Dataset
Earlier time				Later time
Weekdays		Weekends		Weekdays		Weekends		Mean	Country		Published in		Reference
BT	RT	BT	RT	BT	RT	BT	RT	Age		Method	Authors	Year
20.65	6.62	20.88	6.87	21.67	7.28	22.03	8.18	4	Japan	0	Doi et al	2016	Doi Y, Ishihara K, Uchiyama M. Epidemiological study on chronotype among preschool children in Japan: Prevalence, sleep-wake patterns, and associated factors. Chronobiol Int. 2016;33(10):1340-1350.
21.05	6.82	21.1	7.18	21.48	6.88	22.05	8.1	4	Japan	0	Fukuda et al.	2019	Fukuda K, Hasegawa T, Kawahashi I, Imada S, Preschool children’s eating and sleeping habits: Late rising and brunch on weekends is related to several physical and mental symptoms, Sleep Med. 2019
20.5	6.5	20.8333	7	21.5	7	22	8	5	Japan	0	Doi et al	2014	Doi Y, Ishihara K, Uchiyama M. Sleep/wake patterns and circadian typology in preschool children based on standardized parental self-reports. Chronobiol Int. 2014 Apr;31(3):328-36. doi: 10.3109/07420528.2013.852103.
21.25	7.1	21.4	7.2	21.45	7.2	22.3	7.5	8.1	Finland	0	Kuula et al	2018	Kuula L, Pesonen AK, Merikanto I, Gradisar M, Lahti J, Heinonen K, Kajantie E, Räikkönen K. Development of Late Circadian Preference: Sleep Timing From Childhood to Late Adolescence. J Pediatr. 2018 Mar;194:182-189.e1. doi: 10.1016/j.jpeds.2017.10.068.
21.1167	6.66667	22	8	22.5	7.25	23	9.66667	9.3	China	0	Yeung et al	2019	Yeung WF, Yu BY, Ho YS, Ho FYY, Chung KF, Lee RLT, Wong C, Lam MY. Validation of the Chinese Version of the Children's ChronoType Questionnaire (CCTQ) in school-aged children. Chronobiol Int. 2019 Dec;36(12):1681-1690. doi: 10.1080/07420528.2019.1673769.
21.5167	6.6	22.0375	7.74583	22.6708	7.04583	23.3312	9.43542	9.4	Hong Kong	0	Yu et al	2020	Yu BY, Yeung WF, Ho YS, Ho FYY, Chung KF, Lee RLT, Lam MY, Chen S. Associations between the Chronotypes and Eating Habits of Hong Kong School-Aged Children. Int J Environ Res Public Health. 2020 Apr 9;17(7):2583. doi: 10.3390/ijerph17072583.
21.6	6.8	22.9	8.85	22.75	7.81667	24.3833	10.2833	10.8	Mexico	0	Arrona-Palacios et al	2021	Arrona-Palacios A, Díaz-Morales JF, Adan A. Sleep habits and circadian preferences in school-aged children attending a Mexican double-shift school system. Sleep Med. 2021 Feb 13;81:116-119. doi: 10.1016/j.sleep.2021.02.016.
21.23	6.73	21.98	8.58	21.48	6.88	23.8	9.62	12	UK	0	Arora &Taheri	2015	Arora T, Taheri S. Associations among late chronotype, body mass index and dietary behaviors in young adolescents. Int J Obes (Lond) 2015;39(1):39-44.
22.2	7.1	22.45	8	22.45	7.4	23.35	9.1	12.3	Finland	0	Kuula et al	2018	Kuula L, Pesonen AK, Merikanto I, Gradisar M, Lahti J, Heinonen K, Kajantie E, Räikkönen K. Development of Late Circadian Preference: Sleep Timing From Childhood to Late Adolescence. J Pediatr. 2018 Mar;194:182-189.e1. doi: 10.1016/j.jpeds.2017.10.068.
22.2	7	22.3	7.3	22.5	6.9	23.3	7.5	13.2	Australia	2	Agostini et al	2018	Agostini A, Pignata S, Camporeale R, Scott K, Dorrian J, Way A, Ryan P, Martin J, Kennedy D, Lushington K. Changes in growth and sleep across school nights, weekends and a winter holiday period in two Australian schools. Chronobiol Int. 2018 May;35(5):691-704. doi: 10.1080/07420528.2018.1430037.
22.2	6.83	23.68	8.67	23.35	7.18	25.23	11.37	13.8	Italy	0	Russo et al	2007	Russo PM, Bruni O, Lucidi F, Ferri R, Violani C. Sleep habits and circadian preference in Italian children and adolescents. J Sleep Res 2007;16:163–9.
22.73	7.25	24.08	9.93	23.52	7.43	25.23	11.33	14.1	Spain	0	Collado et al	2012	Collado Mateo MJ, Díaz-Morales JF, Escribano Barreno C, Delgado Prieto P, Randler C. Morningness-eveningness and sleep habits among adolescents: age and gender differences. Psicothema. 2012;24(3):410-5.
22.53	7.28	23.02	9.15	24.37	8.32	25.82	11.5	14.1	Mexico	2	Arrona-Palacios	2015	Arrona-Palacios A, García A, Valdez P. Sleep-wake habits and circadian preference in Mexican secondary school. Sleep Med. 2015;16(10):1259-64.
22.83	7.2	24.35	10	23.63	7.4	25.77	11.42	14.3	Spain	0	Diaz-Morales et	2007	Díaz-Morales JF, de León MC, Sorroche MG. Validity of the Morningness-Eveningness Scale for Children among Spanish adolescents. Chronobiol Int. 2007;24(3):435-47.
22.6833	6.65	23.4	9.1	23.95	6.8	25.1333	11.3	14.5	Hong Kong	0	Li et al.	2018	Li SX, Chan NY, Man Yu MW, Lam SP, Zhang J, Yan Chan JW, Li AM, Wing YK. Eveningness chronotype, insomnia symptoms, and emotional and behavioural problems in adolescents. Sleep Med. 2018;47:93-99.
22.2	6.5	23.98	9.07	23.52	6.72	25.6	11.38	14.5	Croatia	0	Koscec et al.	2013	Koscec A, Radosevic-Vidacek B, Bakotic M. Morningness-eveningness and sleep patterns of adolescents attending school in two rotating shifts.Chronobiol Int. 2014; 31(1):52-63.
22.4667	7.08333	23.8167	8.13333	24.2	8.31667	25.3167	9.43333	14.5	Canada	0	Martin et al.	2016	Martin JS, Gaudreault MM, Perron M, Laberge L. Chronotype, Light Exposure, Sleep, and Daytime Functioning in High School Students Attending Morning or Afternoon SchoolShifts: An Actigraphic Study.J Biol Rhythms. 2016;31(2):205-17.
22.45	6.56667	23.1	8.8	23.8	6.81667	25.15	10.7167	14.8	China	0	Chan et al	2020	Chan NY, Zhang J, Tsang CC, Li AM, Chan JWY, Wing YK, Li SX. The associations of insomnia symptoms and chronotype with daytime sleepiness, mood symptoms and suicide risk in adolescents. Sleep Med. 2020 Oct;74:124-131. doi: 10.1016/j.sleep.2020.05.035.
22.5	6.67	23.67	8.92	23.08	7.17	25.25	10.92	15	Italy	0	Giannotti et al.	2002	Giannotti F, Cortesi F, Sebastiani T, Ottaviano S. Circadian preference, sleep and daytime behaviour in adolescence. J Sleep Res. 2002 Sep;11(3):191-9.
22.85	5.49	23.08	6.84	23.57	5.89	24.22	8.39	15	India	0	Pande et al.	2018	Pande · B, Parveen · N, Parganiha A,· Pati AK. Shortening of sleep length and delayed mid-sleep on free days are the characteristic features of predominantly morning active population of Indian teenagers.Sleep and Circadian Rhythms· 2018, 16(4): 431-440
23.7667	6.86667	24.15	9.41667	24.3	6.91667	24.9667	10.3	15.1	Korea	0	Chung et al	2021	Chung JS, Choi E, Lee AR, Kim SY, Lee K, Kim BN, Park S, Jung KI, Lee SY, Park MH. The difference in sleep, depression, anxiety, and Internet addiction between Korean adolescents with different circadian preference. Indian J Psychiatry. 2020 Sep-Oct;62(5):524-530. doi: 10.4103/psychiatry.IndianJPsychiatry_254_19.
22.55	7.2	24.1	8.1	24.45	8.15	25.4	10.1	16.9	Finland	0	Kuula et al	2018	Kuula L, Pesonen AK, Merikanto I, Gradisar M, Lahti J, Heinonen K, Kajantie E, Räikkönen K. Development of Late Circadian Preference: Sleep Timing From Childhood to Late Adolescence. J Pediatr. 2018 Mar;194:182-189.e1. doi: 10.1016/j.jpeds.2017.10.068.
22.5	6.42	24.42	9.17	23.5	7.17	26.42	11.42	17.5	Italy	0	Giannotti et al.	2002	Giannotti F, Cortesi F, Sebastiani T, Ottaviano S. Circadian preference, sleep and daytime behaviour in adolescence. J Sleep Res. 2002 Sep;11(3):191-9.
23.38	6.63	24.17	9.68	23.8	7.42	25.5	11.32	17.5	Finland	0	Lehto et al	2016	Lehto JE, Aho O, Eklund M, Heinaro M, Kettunen S, Peltomäki A, Ylä-Kotola K, Öst K, Partonen T. Circadian preferences and sleep in 15- to 20-year old Finnish students. Sleep Sci. 2016;9(2):78-83.
23.6	8.65	24.25	9.55	26	9.2	26.45	10.85	18.9	UK	1	Shochat et al	2019	Shochat T, Santhi N, Herer P, Flavell SA, Skeldon AC, Dijk DJ. Sleep Timing in Late Autumn and Late Spring Associates With Light Exposure Rather Than Sun Time in College Students. Front Neurosci. 2019 Aug 28;13:882. doi: 10.3389/fnins.2019.00882.
24.55	8.08333	25.4	10.0333	26.0333	9.31667	27.05	12.1667	19	Turkey	0	Önder	2021	Önder I. Association of happiness with morningness - eveningness preference, sleep-related variables and academic performance in university students, Biological Rhythm Research, 2021
23	6.67	23.55	7.85	24.45	7.55	27.05	11.33	19.6	Brazil	2	Korczak et al.	2008	Korczak AL, Martynhak BJ, Pedrazzoli M, Brito AF, Louzada FM. Influence of chronotype and social zeitgebers on sleep/wake patterns. Braz J Med Biol Res. 2008;41(10):914-9.
23.2	7.07	24.37	8.27	24.78	8.55	26.62	11.63	19.6	Lebanon	0	Kabrita et al	2014	Kabrita CS, Hajjar-Muça TA, Duffy JF. Predictors of poor sleep quality among Lebanese university students: association between evening typology, lifestyle behaviors, and sleep habits. Nat Sci Sleep. 2014;6:11-8.
25.0167	8.11667	25.4383	9.52833	26.325	8.475	26.9383	11.1283	19.6	USA	1	Taylor et al	2020	Taylor BJ, Bowman MA, Brindle A, Hasler BP, Roecklein KA, Krafty RT, Matthews KA, Hall MH. Evening chronotype, alcohol use disorder severity, and emotion regulation in college students. Chronobiol Int. 2020 Dec;37(12):1725-1735. doi: 10.1080/07420528.2020.1800028.
23.6	5.93333	23.5167	7.06667	25.15	6.91667	25.5667	10.1833	19.9	Japan	0	Kayaba et al	2021	Kayaba M, Matsushita T, Katayama N, Inoue Y, Sasai-Sakuma T. Chronotype and its association with lifestyle, health-related quality of life and academic performance among Japanese nursing students: A cross-sectional study. Research Square; 2020. DOI: 10.21203/rs.3.rs-51264/v1.
23.1167	6.66667	23.0167	7.68333	24.6667	8.13333	24.9667	9.71667	20	Brazil	1	Duarte & Menna-Barreto	2021	Duarte LL & Menna-Barreto L Chronotypes and circadian rhythms in university students, Biological Rhythm Research, 2021: DOI: 10.1080/09291016.2021.1903791
23.63	7.17	25.25	8.97	24.05	7.98	26.22	10.28	21.3	Italy	2	Vitale et al	2015	Vitale JA, Roveda E, Montaruli A, Galasso L, Weydahl A, Caumo A, Carandente F. Chronotype influences activity circadian rhythm and sleep: differences in sleep quality between weekdays and weekend. Chronobiol Int. 2015;32(3):405-15.
23.35	7.35	23.4333	7.93333	25.3833	9.08333	25.7333	9.93333	22.1	Netherlands	0	Leenaars et al	2019	Leenaars CHC, Lucassen MFG, Borger N, Houben E, Kalsbeek A. Social Jet-Lag in Tertiary Students Following a Modern Curriculum with Few Time-Tabled Contact Hours: A Pilot Study. Clocks Sleep. 2019 Jul 8;1(3):306-318. doi: 10.3390/clockssleep1030026.
23.35	7.35	23.6417	7.725	25.675	8.79167	25.8167	9.85	22.3	Netherlands	1	Leenaars et al	2019	Leenaars CHC, Lucassen MFG, Borger N, Houben E, Kalsbeek A. Social Jet-Lag in Tertiary Students Following a Modern Curriculum with Few Time-Tabled Contact Hours: A Pilot Study. Clocks Sleep. 2019 Jul 8;1(3):306-318. doi: 10.3390/clockssleep1030026.
22.95	6.95	24.2167	8.33333	24.2	8	25.5667	9.9	23.5	USA	2	Brooks et al	2021	Brooks C, Shaafi Kabiri N, Bhangu J, Cai X, Pickering E, Erb MK, Auerbach S, Bonato P, Moore TL, Mortazavi F, Thomas K. The impact of chronotype on circadian rest-activity rhythm and sleep characteristics across the week. Chronobiol Int. 2021 Jun 16:1-16. doi: 10.1080/07420528.2021.1937197.
23.1	7.15	25.25	9.5	23.2167	8.56667	25.6	10.65	24.8	Germany	0	Faßl et al	2019	Faßl C, Quante M, Mariani S, Randler C. Preliminary findings for the validity of the Morningness-Eveningness-Stability Scale improved (MESSi): Correlations with activity levels and personality. Chronobiol Int. 2019 Jan;36(1):135-142. doi: 10.1080/07420528.2018.1519570.
22.1	6.15	22.7	7.18	25.1	9.7	25.72	10.17	26	USA	0	Rosenthal et al	2001	Rosenthal L, Day R, Gerhardstein R, Meixner R, Roth T, Guido P, Fortier J. Sleepiness/alertness among healthy evening and morning type individuals. Sleep Med. 2001;2(3):243-248.
23.5	6.75	24.83	8.88	24	6.83	25.67	9.83	26	USA	0	Sexton-Radex &	1992	Sexton-Radex K, Harris D. Morningness versus eveningness arousal patterns in young adults. Percept Mot Skills. 1992, 74(1):115-9.
23.4	6.4	25	7	23.6	7	25.9	10.5	26.5	Singapore	0	Takahashi et al	2018	Takahashi M, Tahara Y, Tsubosaka M, Fukazawa M, Ozaki M, Iwakami T, Nakaoka T, Shibata S. Chronotype and social jetlag influence human circadian clock gene expression.Sci Rep. 2018 8(1):10152.
23.4167	6.26667	23.6	6.81667	24.3833	7.85	25.6	10.0333	31.45	Korea	0	Lee et al	2014	Lee JH, Kim SJ, Lee SY, Jang KH, Kim IS, Duffy JF. Reliability and validity of the Korean version of Morningness-Eveningness Questionnaire in adults aged 20-39 years. Chronobiol Int. 2014 May;31(4):479-86. doi: 10.3109/07420528.2013.867864.
22.93	7.17	24.48	8.55	24.83	8.7	26.13	10.85	35	Portugal	0	Miller-Mendes e	2019	Miller-Mendes M, Gomes AA, Ruivo Marques D, Clemente V, Azevedo MH.BaSIQS - basic scale on insomnia complaints and quality of sleep: reliability, norms, validity, and accuracy studies, based on clinical and community samples. Chronobiol Int. 2019 36(5):644-656.
22.55	6.28	23.15	7.3	25.08	8.67	25.53	10.52	36	USA	0	Roepke&Duffy	2010	Roepke SE, Duffy JF. Differential impact of chronotype on weekday and weekend sleep timing and duration. Nat Sci Sleep. 2010;2010(2):213-220.
22.7	6.55	23.4	8.1	23.7	7.5	24.6667	9.88333	36.1	France	0	Taillard et al	1999	Taillard J, Philip P, Bioulac B. Morningness/eveningness and the need for sleep.J Sleep Res. 1999;8(4):291-5.
25.0333	6.35	24.7667	7.5	25.2833	7.58333	25.6833	9.56667	38.8	Finland	0	Merikanto et al.	2021	Merikanto I, Kortesoja L, Benedict C, Chung F, Cedernaes J, Espie CA, Morin CM, Dauvilliers Y, Partinen M, De Gennaro L, Wing YK, Chan NY, Inoue Y, Matsui K, Holzinger B, Plazzi G, Mota-Rolim SA, Leger D, Penzel T, Bjorvatn B. Evening-types show highest increase of sleep and mental health problems during the COVID-19 pandemic - Multinational study on 19,267 adults. Sleep. 2021 Aug 25:zsab216. doi…
23.3	5.9	23.7	7.05	24.3	7	24.8	8.1	40.2	USA	2	Lucassen et al	2013	Lucassen EA, Zhao X, Rother KI, Mattingly MS, Courville AB, et al. Evening Chronotype Is Associated with Changes in Eating Behavior, More Sleep Apnea, and Increased Stress Hormones in Short Sleeping Obese Individuals. PLoS ONE 2013, 8(3): e56519. doi:10.1371/journal.pone.0056519
22.62	5.93	23.12	7.07	23.78	7.23	24.23	8.93	41.1	New Zealand	2	Paine & Gander	2016	Paine SJ, Gander PH. Differences in circadian phase and weekday/weekend sleep patterns in a sample of middle-aged morning types and eveningtypes. Chronobiol Int. 2016;33(8):1009-17.
21.5944	6.06111	23.0389	7.61111	23.3611	7.51111	24.4722	9.52778	49.6	Finland	0	Suikki et al	2021	Suikki T, Maukonen M, Partonen T, Jousilahti P, Kanerva N, Männistö S. Association between social jet lag, quality of diet and obesity by diurnal preference in Finnish adult population. Chronobiol Int. 2021 Feb 8:1-12. doi: 10.1080/07420528.2021.1876721.
23.0667	5.33333	23.2	6.93333	25.8	8.4	25.8667	10.25	50.8	Hong Kong	0	Chan et al	2014	Chan JW, Lam SP, Li SX, Yu MW, Chan NY, Zhang J, Wing YK. Eveningness and insomnia: independent risk factors of nonremission in major depressive disorder. Sleep. 2014;37(5):911-7.
22.85	6.2	23.2	7.38	23.43	6.78	23.9	8.52	51.3	France	0	Taillard et al	2004	Taillard J, Philip P, Chastang JF, Bioulac B. Validation of Horne and Ostberg morningness-eveningness questionnaire in a middle-aged population of French workers. J Biol Rhythms. 2004;19(1):76-86.
21.37	5.22	21.3	5.58	24.03	8.77	25.22	9.88	58.4	Mexico	0	Reutrakul et al	2013	Reutrakul S, Hood MM, Crowley SJ, Morgan MK, Teodori M, Knutson KL, Van Cauter E. Chronotype is independently associated with glycemic control in type 2 diabetes. Diabetes Care. 2013;36(9):2523-9.
										2 - Actigraphy and other divices
										1 - Diary
										0 - Survey

## Sheet: Questionnaires
	Instruments		and	Sample sizes
	Instrument			Sample size			Reference
n	Preference/sleep times	Name	Items	Early	Late	Total
	1	CCTQ	27	2473	783	3256	Doi Y, Ishihara K, Uchiyama M. Epidemiological study on chronotype among preschool children in Japan: Prevalence, sleep-wake patterns, and associated factors. Chronobiol Int. 2016;33(10):1340-1350.
	1	CCTQ	27	60	141	201	Yeung WF, Yu BY, Ho YS, Ho FYY, Chung KF, Lee RLT, Wong C, Lam MY. Validation of the Chinese Version of the Children's ChronoType Questionnaire (CCTQ) in school-aged children. Chronobiol Int. 2019 Dec;36(12):1681-1690. doi: 10.1080/07420528.2019.1673769.
3	1	CCTQ	27	54	115	169	Yu BY, Yeung WF, Ho YS, Ho FYY, Chung KF, Lee RLT, Lam MY, Chen S. Associations between the Chronotypes and Eating Habits of Hong Kong School-Aged Children. Int J Environ Res Public Health. 2020 Apr 9;17(7):2583. doi: 10.3390/ijerph17072583.
	1	CSM	13			1228	Miller-Mendes M, Gomes AA, Ruivo Marques D, Clemente V, Azevedo MH. BaSIQS - basic scale on insomnia complaints and quality of sleep: reliability, norms, validity, and accuracy studies, based on clinical and community samples. Chronobiol Int. 2019 36(5):644-656.
	1	CSM	13	135	125	260	Önder I. Association of happiness with morningness - eveningness preference, sleep-related variables and academic performance in university students, Biological Rhythm Research, 2021
3	1	CSM	13	51	30	81	Taylor BJ, Bowman MA, Brindle A, Hasler BP, Roecklein KA, Krafty RT, Matthews KA, Hall MH. Evening chronotype, alcohol use disorder severity, and emotion regulation in college students. Chronobiol Int. 2020 Dec;37(12):1725-1735. doi: 10.1080/07420528.2020.1800028.
	1	MEQ	19	139	250	389	Arora T, Taheri S. Associations among late chronotype, body mass index and dietary behaviors in young adolescents. Int J Obes (Lond) 2015;39(1):39-44.
	1	MEQ	19	9	15	24	Brooks C, Shaafi Kabiri N, Bhangu J, Cai X, Pickering E, Erb MK, Auerbach S, Bonato P, Moore TL, Mortazavi F, Thomas K. The impact of chronotype on circadian rest-activity rhythm and sleep characteristics across the week. Chronobiol Int. 2021 Jun 16:1-16. doi: 10.1080/07420528.2021.1937197.
	1	MEQ	19	62	49	111	Chan JW, Lam SP, Li SX, Yu MW, Chan NY, Zhang J, Wing YK. Eveningness and insomnia: independent risk factors of nonremission in major depressive disorder. Sleep. 2014;37(5):911-7.
	1	MEQ	19	8	7	15	Duarte LL & Menna-Barreto L Chronotypes and circadian rhythms in university students, Biological Rhythm Research, 2021: DOI: 10.1080/09291016.2021.1903791
	1	MEQ	19	32	107	139	Kabrita CS, Hajjar-Muça TA, Duffy JF. Predictors of poor sleep quality among Lebanese university students: association between evening typology, lifestyle behaviors, and sleep habits. Nat Sci Sleep. 2014;6:11-8.
	1	MEQ	19	48	80	128	Kayaba M, Matsushita T, Katayama N, Inoue Y, Sasai-Sakuma T. Chronotype and its association with lifestyle, health-related quality of life and academic performance among Japanese nursing students: A cross-sectional study. Research Square; 2020. DOI: 10.21203/rs.3.rs-51264/v1.
	1	MEQ	19	8	8	16	Korczak AL, Martynhak BJ, Pedrazzoli M, Brito AF, Louzada FM. Influence of chronotype and social zeitgebers on sleep/wake patterns. Braz J Med Biol Res. 2008;41(10):914-9.
	1	MEQ	19	15	16	31	Lee JH, Kim SJ, Lee SY, Jang KH, Kim IS, Duffy JF. Reliability and validity of the Korean version of Morningness-Eveningness Questionnaire in adults aged 20-39 years. Chronobiol Int. 2014 May;31(4):479-86. doi: 10.3109/07420528.2013.867864.
	1	MEQ	19	80	39	119	Lucassen EA, Zhao X, Rother KI, Mattingly MS, Courville AB, et al. Evening Chronotype Is Associated with Changes in Eating Behavior, More Sleep Apnea, and Increased Stress Hormones in Short Sleeping Obese Individuals. PLoS ONE 2013, 8(3): e56519. doi:10.1371/journal.pone.0056519
	1	MEQ	19	14	14	28	Paine SJ, Gander PH. Differences in circadian phase and weekday/weekend sleep patterns in a sample of middle-aged morning types and eveningtypes. Chronobiol Int. 2016;33(8):1009-17.
	1	MEQ	19			145	Roepke SE, Duffy JF. Differential impact of chronotype on weekday and weekend sleep timing and duration. Nat Sci Sleep. 2010;2010(2):213-220.
	1	MEQ	19	7	9	16	Rosenthal L, Day R, Gerhardstein R, Meixner R, Roth T, Guido P, Fortier J. Sleepiness/alertness among healthy evening and morning type individuals. Sleep Med. 2001;2(3):243-248.
	1	MEQ	19	9	11	20	Sexton-Radex K, Harris D. Morningness versus eveningness arousal patterns in young adults. Percept Mot Skills. 1992, 74(1):115-9.
	1	MEQ	19	351	12	363	Taillard J, Philip P, Chastang JF, Bioulac B. Validation of Horne and Ostberg morningness-eveningness questionnaire in a middle-aged population of French workers. J Biol Rhythms. 2004;19(1):76-86.
	1	MEQ	19	8	8	16	Takahashi M, Tahara Y, Tsubosaka M, Fukazawa M, Ozaki M, Iwakami T, Nakaoka T, Shibata S. Chronotype and social jetlag influence human circadian clock gene expression.Sci Rep. 2018 8(1):10152.
16	1	MEQ	19	16	19	35	Vitale JA, Roveda E, Montaruli A, Galasso L, Weydahl A, Caumo A, Carandente F. Chronotype influences activity circadian rhythm and sleep: differences in sleep quality between weekdays and weekend. Chronobiol Int. 2015;32(3):405-15.
	1	MES	10			63	Agostini A, Pignata S, Camporeale R, Scott K, Dorrian J, Way A, Ryan P, Martin J, Kennedy D, Lushington K. Changes in growth and sleep across school nights, weekends and a winter holiday period in two Australian schools. Chronobiol Int. 2018 May;35(5):691-704. doi: 10.1080/07420528.2018.1430037.
	1	MES	10	131	116	247	Arrona-Palacios A, Díaz-Morales JF, Adan A. Sleep habits and circadian preferences in school-aged children attending a Mexican double-shift school system. Sleep Med. 2021 Feb 13;81:116-119. doi: 10.1016/j.sleep.2021.02.016.
	1	MES	10	211	258	469	Chung JS, Choi E, Lee AR, Kim SY, Lee K, Kim BN, Park S, Jung KI, Lee SY, Park MH. The difference in sleep, depression, anxiety, and Internet addiction between Korean adolescents with different circadian preference. Indian J Psychiatry. 2020 Sep-Oct;62(5):524-530. doi: 10.4103/psychiatry.IndianJPsychiatry_254_19.
	1	MES	10	633	633	1266	Collado Mateo MJ, Díaz-Morales JF, Escribano Barreno C, Delgado Prieto P, Randler C. Morningness-eveningness and sleep habits among adolescents: age and gender differences. Psicothema. 2012;24(3):410-5.
	1	MES	10	142	141	283	Díaz-Morales JF, de León MC, Sorroche MG. Validity of the Morningness-Eveningness Scale for Children among Spanish adolescents. Chronobiol Int. 2007;24(3):435-47.
	1	MES	10	139	43	182	Doi Y, Ishihara K, Uchiyama M. Sleep/wake patterns and circadian typology in preschool children based on standardized parental self-reports. Chronobiol Int. 2014 Apr;31(3):328-36. doi: 10.3109/07420528.2013.852103.
	1	MES	10	1005	742	1747	Giannotti F, Cortesi F, Sebastiani T, Ottaviano S. Circadian preference, sleep and daytime behaviour in adolescence. J Sleep Res. 2002 Sep;11(3):191-9.
	1	MES	10	1005	742	1747	Giannotti F, Cortesi F, Sebastiani T, Ottaviano S. Circadian preference, sleep and daytime behaviour in adolescence. J Sleep Res. 2002 Sep;11(3):191-9.
	1	MES	10	190	227	417	Koscec A, Radosevic-Vidacek B, Bakotic M. Morningness-eveningness and sleep patterns of adolescents attending school in two rotating shifts.Chronobiol Int. 2014; 31(1):52-63.
	1	MES	10	16	15	31	Martin JS, Gaudreault MM, Perron M, Laberge L. Chronotype, Light Exposure, Sleep, and Daytime Functioning in High School Students Attending Morning or Afternoon SchoolShifts: An Actigraphic Study.J Biol Rhythms. 2016;31(2):205-17.
11	1	MES	10	117	111	228	Russo PM, Bruni O, Lucidi F, Ferri R, Violani C. Sleep habits and circadian preference in Italian children and adolescents. J Sleep Res 2007;16:163–9.
	1	rMEQ	5	131	426	557	Chan NY, Zhang J, Tsang CC, Li AM, Chan JWY, Wing YK, Li SX. The associations of insomnia symptoms and chronotype with daytime sleepiness, mood symptoms and suicide risk in adolescents. Sleep Med. 2020 Oct;74:124-131. doi: 10.1016/j.sleep.2020.05.035.
	1	rMEQ	5	22	20	42	Faßl C, Quante M, Mariani S, Randler C. Preliminary findings for the validity of the Morningness-Eveningness-Stability Scale improved (MESSi): Correlations with activity levels and personality. Chronobiol Int. 2019 Jan;36(1):135-142. doi: 10.1080/07420528.2018.1519570.
	1	rMEQ	6	17	28	45	Kuula L, Pesonen AK, Merikanto I, Gradisar M, Lahti J, Heinonen K, Kajantie E, Räikkönen K. Development of Late Circadian Preference: Sleep Timing From Childhood to Late Adolescence. J Pediatr. 2018 Mar;194:182-189.e1. doi: 10.1016/j.jpeds.2017.10.068.
	1	rMEQ	6	17	28	45	Kuula L, Pesonen AK, Merikanto I, Gradisar M, Lahti J, Heinonen K, Kajantie E, Räikkönen K. Development of Late Circadian Preference: Sleep Timing From Childhood to Late Adolescence. J Pediatr. 2018 Mar;194:182-189.e1. doi: 10.1016/j.jpeds.2017.10.068.
	1	rMEQ	6	17	28	45	Kuula L, Pesonen AK, Merikanto I, Gradisar M, Lahti J, Heinonen K, Kajantie E, Räikkönen K. Development of Late Circadian Preference: Sleep Timing From Childhood to Late Adolescence. J Pediatr. 2018 Mar;194:182-189.e1. doi: 10.1016/j.jpeds.2017.10.068.
	1	rMEQ	6	47	194	241	Lehto JE, Aho O, Eklund M, Heinaro M, Kettunen S, Peltomäki A, Ylä-Kotola K, Öst K, Partonen T. Circadian preferences and sleep in 15- to 20-year old Finnish students. Sleep Sci. 2016;9(2):78-83.
	1	rMEQ	5	439	1149	1588	Li SX, Chan NY, Man Yu MW, Lam SP, Zhang J, Yan Chan JW, Li AM, Wing YK. Eveningness chronotype, insomnia symptoms, and emotional and behavioural problems in adolescents. Sleep Med. 2018;47:93-99.
	1	rMEQ	7			965	Pande · B, Parveen · N, Parganiha A,· Pati AK. Shortening of sleep length and delayed mid-sleep on free days are the characteristic features of predominantly morning active population of Indian teenagers.Sleep and Circadian Rhythms· 2018, 16(4): 431-440
	1	rMEQ	6	2966	936	3902	Suikki T, Maukonen M, Partonen T, Jousilahti P, Kanerva N, Männistö S. Association between social jet lag, quality of diet and obesity by diurnal preference in Finnish adult population. Chronobiol Int. 2021 Feb 8:1-12. doi: 10.1080/07420528.2021.1876721.
10	1	rMEQ	5	219	219	438	Taillard J, Philip P, Bioulac B. Morningness/eveningness and the need for sleep.J Sleep Res. 1999;8(4):291-5.
1	1	Self-ME	1	3171	2135	5306	Merikanto I, Kortesoja L, Benedict C, Chung F, Cedernaes J, Espie CA, Morin CM, Dauvilliers Y, Partinen M, De Gennaro L, Wing YK, Chan NY, Inoue Y, Matsui K, Holzinger B, Plazzi G, Mota-Rolim SA, Leger D, Penzel T, Bjorvatn B. Evening-types show highest increase of sleep and mental health problems during the COVID-19 pandemic - Multinational study on 19,267 adults. Sleep. 2021 Aug 25:zsab216. doi…
1	1	STQ	18	17	47	64	Arrona-Palacios A, García A, Valdez P. Sleep-wake habits and circadian preference in Mexican secondary school. Sleep Med. 2015;16(10):1259-64.
	2			127	259	386	Fukuda K, Hasegawa T, Kawahashi I, Imada S, Preschool children’s eating and sleeping habits: Late rising and brunch on weekends is related to several physical and mental symptoms, Sleep Med. 2019
	2			11	22	33	Leenaars CHC, Lucassen MFG, Borger N, Houben E, Kalsbeek A. Social Jet-Lag in Tertiary Students Following a Modern Curriculum with Few Time-Tabled Contact Hours: A Pilot Study. Clocks Sleep. 2019 Jul 8;1(3):306-318. doi: 10.3390/clockssleep1030026.
	2			11	22	33	Leenaars CHC, Lucassen MFG, Borger N, Houben E, Kalsbeek A. Social Jet-Lag in Tertiary Students Following a Modern Curriculum with Few Time-Tabled Contact Hours: A Pilot Study. Clocks Sleep. 2019 Jul 8;1(3):306-318. doi: 10.3390/clockssleep1030026.
	2			51	48	99	Reutrakul S, Hood MM, Crowley SJ, Morgan MK, Teodori M, Knutson KL, Van Cauter E. Chronotype is independently associated with glycemic control in type 2 diabetes. Diabetes Care. 2013;36(9):2523-9.
10	2			8	7	15	Shochat T, Santhi N, Herer P, Flavell SA, Skeldon AC, Dijk DJ. Sleep Timing in Late Autumn and Late Spring Associates With Light Exposure Rather Than Sun Time in College Students. Front Neurosci. 2019 Aug 28;13:882. doi: 10.3389/fnins.2019.00882.
	1 - Preference questionnaire
	2 - Current sleep times
		Name	Items				Instrument: Reference
		CCTQ	27				Werner H, Lebourgeois MK, Geiger A, Jenni OG. (2009).Assessment of chronotype in four- to eleven-year-old children: Reliability and validity of the Children’s Chronotype Questionnaire (CCTQ). Chronobiol Int. 26:992–1014.
		CSM	13				Smith CS, Reilly C, Midkiff K. 1989. Evaluation of three circadian rhythm questionnaires with suggestions for an improved mea_x0002_sure of Morningness. J Appl Psychol. 74(5):728–738.
		MEQ	19				Horne JA, Ostberg O. A self-assessment questionnaire to determine morningness-eveningness in human circadian rhythms. Int J Chronobiol 1976;4:97–110.
		MES	10				Carskadon MA, Vieria C, Acebo C. 1993. Association between puberty and delayed phase preference. Sleep. 16:258–62.
		rMEQ	5				Adan A, Almirall H. 1991. Horne & Östberg morningness-eveningness questionnaire: A reduced scale. Personal Individ Differ. 12(3):241–53.
		rMEQ	6				Hatonen T, Forsblom S, Kieseppa T, Lonnqvist J, Partonen T. Circadian phenotype in patients with the co-morbid alcohol use and bipolar disorders. Alcohol Alcohol 2008;43:564-8.
		rMEQ	7				Gupta S, Pati AK. Characteristics of circadian rhythm in six variables of morning active and evening active healthy human subjects. Ind J Physiol Pharmacol. 1994;38:101–7.
		Self-ME	1				Turco M, Corrias M, Chiaromanni F, et al. The self-morningness/eveningness (Self-ME): An extremely concise and totally subjective assessment of diurnal preference. Chronobiology international. 2015;32(9):1192-1200.
		STQ	18				Monk T, Buysse D, Kennedy K, et al. Measuring sleep habits without using a diary: the Sleep Timing Questionnaire. Sleep 2003;26:208–12.
